# Supplementary material
Source: PubMed Central journal article supplement (PMC8403667)
Supplement: mmc1.pdf [file mmc1.pdf]

**Supplemental Table 1**

|                                | N    | Negative |      | <1000 BAU/mL |      | 1000-1500 BAU/mL |      | 1500-2000 BAU/mL |      | >2000 BAU/mL |       | p*     |
|--------------------------------|------|----------|------|--------------|------|------------------|------|------------------|------|--------------|-------|--------|
|                                |      | n        | %    | n            | %    | n                | %    | n                | %    | n            | %     |        |
| <b>At least one</b>            |      |          |      |              |      |                  |      |                  |      |              |       | 0.715  |
| No                             | 1458 | 0        | 0.0  | 45           | 3.1  | 134              | 9.2  | 296              | 20.3 | 983          | 67.4  |        |
| Yes                            | 428  | 4        | 0.9  | 22           | 5.1  | 39               | 9.1  | 73               | 17.1 | 290          | 67.8  |        |
| <b>Immunosuppression</b>       |      |          |      |              |      |                  |      |                  |      |              |       | <0.001 |
| No                             | 1859 | 0        | 0.0  | 63           | 3.4  | 172              | 9.3  | 361              | 19.4 | 1263         | 67.9  |        |
| Yes                            | 27   | 4        | 14.8 | 4            | 14.8 | 1                | 3.7  | 8                | 29.6 | 10           | 37.0  |        |
| <b>Autoimmune diseases</b>     |      |          |      |              |      |                  |      |                  |      |              |       | 0.694  |
| No                             | 1819 | 2        | 0.1  | 64           | 3.5  | 168              | 9.2  | 356              | 19.6 | 1229         | 67.6  |        |
| Yes                            | 68   | 2        | 2.9  | 3            | 4.4  | 5                | 7.4  | 13               | 19.1 | 45           | 66.2  |        |
| <b>Cardiovascular diseases</b> |      |          |      |              |      |                  |      |                  |      |              |       | 0.157  |
| No                             | 1683 | 4        | 0.2  | 53           | 3.1  | 152              | 9.0  | 331              | 19.7 | 1143         | 67.9  |        |
| Yes                            | 204  | 0        | 0.0  | 14           | 6.9  | 21               | 10.3 | 38               | 18.6 | 204          | 100.0 |        |
| <b>Hypertension</b>            |      |          |      |              |      |                  |      |                  |      |              |       | 0.470  |
| No                             | 1733 | 4        | 0.2  | 56           | 3.2  | 160              | 9.2  | 340              | 19.6 | 1173         | 67.7  |        |
| Yes                            | 155  | 0        | 0.0  | 11           | 7.1  | 13               | 8.4  | 29               | 18.7 | 102          | 65.8  |        |
| <b>Arrhythmias</b>             |      |          |      |              |      |                  |      |                  |      |              |       | 0.585  |
| No                             | 1864 | 4        | 0.2  | 67           | 3.6  | 169              | 9.1  | 363              | 19.5 | 1261         | 67.7  |        |
| Yes                            | 23   | 0        | 0.0  | 0            | 0.0  | 3                | 13.0 | 6                | 26.1 | 14           | 60.9  |        |
| <b>Hypercholesterolemia</b>    |      |          |      |              |      |                  |      |                  |      |              |       | 0.891  |
| No                             | 1857 | 4        | 0.2  | 65           | 3.5  | 168              | 9.0  | 367              | 19.8 | 1253         | 67.5  |        |
| Yes                            | 30   | 0        | 0.0  | 2            | 6.7  | 5                | 16.7 | 2                | 6.7  | 21           | 70.0  |        |
| <b>Respiratory diseases</b>    |      |          |      |              |      |                  |      |                  |      |              |       | 0.296  |
| No                             | 1828 | 4        | 0.2  | 67           | 3.7  | 167              | 9.1  | 359              | 19.6 | 1231         | 67.3  |        |
| Yes                            | 59   | 0        | 0.0  | 0            | 0.0  | 5                | 8.5  | 10               | 16.9 | 44           | 74.6  |        |
| <b>Allergies</b>               |      |          |      |              |      |                  |      |                  |      |              |       | 0.965  |
| No                             | 1858 | 4        | 0.2  | 67           | 3.6  | 169              | 9.1  | 363              | 19.5 | 1255         | 67.5  |        |

|                       |     |      |   |     |    |      |     |      |     |      |      |      |       |
|-----------------------|-----|------|---|-----|----|------|-----|------|-----|------|------|------|-------|
|                       | Yes | 30   | 0 | 0.0 | 0  | 0.0  | 4   | 13.3 | 6   | 20.0 | 20   | 66.7 |       |
| Multiple sclerosis    |     |      |   |     |    |      |     |      |     |      |      |      | 0.415 |
|                       | No  | 1882 | 4 | 0.2 | 67 | 3.6  | 172 | 9.1  | 367 | 19.5 | 1272 | 67.6 |       |
|                       | Yes | 6    | 0 | 0.0 | 0  | 0.0  | 1   | 16.7 | 2   | 33.3 | 3    | 50.0 |       |
| Endocrine diseases    |     |      |   |     |    |      |     |      |     |      |      |      | 0.155 |
|                       | No  | 1784 | 4 | 0.2 | 64 | 3.6  | 166 | 9.3  | 352 | 19.7 | 1198 | 67.2 |       |
|                       | Yes | 103  | 0 | 0.0 | 3  | 2.9  | 7   | 6.8  | 17  | 16.5 | 76   | 73.8 |       |
| Diabetes              |     |      |   |     |    |      |     |      |     |      |      |      | 0.324 |
|                       | No  | 1858 | 4 | 0.2 | 66 | 3.6  | 168 | 9.0  | 363 | 19.5 | 1257 | 67.7 |       |
|                       | Yes | 30   | 0 | 0.0 | 1  | 3.3  | 5   | 16.7 | 6   | 20.0 | 18   | 60.0 |       |
| HIV                   |     |      |   |     |    |      |     |      |     |      |      |      | 0.056 |
|                       | No  | 1882 | 4 | 0.2 | 66 | 3.5  | 172 | 9.1  | 367 | 19.5 | 1273 | 67.6 |       |
|                       | Yes | 6    | 0 | 0.0 | 1  | 16.7 | 1   | 16.7 | 2   | 33.3 | 2    | 33.3 |       |
| Hepatitis B           |     |      |   |     |    |      |     |      |     |      |      |      | 0.444 |
|                       | No  | 1884 | 4 | 0.2 | 67 | 3.6  | 172 | 9.1  | 368 | 19.5 | 1273 | 67.6 |       |
|                       | Yes | 6    | 0 | 0.0 | 0  | 0.0  | 1   | 16.7 | 1   | 16.7 | 2    | 33.3 |       |
| Medications           |     |      |   |     |    |      |     |      |     |      |      |      |       |
| Estroprogestinic pill |     |      |   |     |    |      |     |      |     |      |      |      | 0.710 |
|                       | No  | 1746 | 4 | 0.2 | 64 | 3.7  | 159 | 9.1  | 337 | 19.3 | 1186 | 67.8 |       |
|                       | Yes | 55   | 0 | 0.0 | 1  | 1.8  | 4   | 7.3  | 9   | 16.4 | 41   | 74.5 |       |
| ACEi                  |     |      |   |     |    |      |     |      |     |      |      |      | 0.604 |
|                       | No  | 1766 | 4 | 0.2 | 59 | 3.3  | 163 | 9.2  | 349 | 19.8 | 1191 | 67.4 |       |
|                       | Yes | 117  | 0 | 0.0 | 8  | 6.8  | 10  | 8.5  | 19  | 16.2 | 80   | 68.4 |       |

\*Mann whitney test

Prevalence of subjects with comorbidities and medications according to classes of anti-S response.

**Supplemental Table 2. Characteristics of subjects with breakthrough SARS-CoV-2 infection after vaccination**

| ID | Gender | Age | Job title            | Body mass index (Kg/m <sup>2</sup> ) | Days from 2 <sup>o</sup> dose to first positive RT-PCR | Nasopharyngeal genomic SARS-CoV-2 RNA load (copies/mL) | Anti-S IgG titers at day-14 after 2 <sup>o</sup> dose (BAU/mL) | Immunosuppressive condition   |
|----|--------|-----|----------------------|--------------------------------------|--------------------------------------------------------|--------------------------------------------------------|----------------------------------------------------------------|-------------------------------|
| 1  | F      | 49  | Other sanitary staff | 33                                   | 39                                                     | >10,000,000                                            | 1648                                                           | None                          |
| 2  | F      | 47  | Administrative staff | n.a.                                 | 47                                                     | 239,400                                                | n.i.                                                           | None                          |
| 3  | F      | 45  | Administrative staff | 34                                   | 51                                                     | >10,000,000                                            | 10000                                                          | None                          |
| 4  | F      | 62  | Medical staff        | 21                                   | 54                                                     | 5,420,000                                              | 1134                                                           | None                          |
| 5  | F      | 39  | Medical staff        | n.a.                                 | 58                                                     | 8,040,000                                              | n.i.                                                           | None                          |
| 6  | F      | 44  | Nurse staff          | n.a.                                 | 59                                                     | 1,195                                                  | n.i.                                                           | None                          |
| 7  | M      | 55  | Other sanitary staff | 27                                   | 62                                                     | 196,933                                                | 1394                                                           | None                          |
| 8  | M      | 50  | Non-sanitary staff   | n.a.                                 | 66                                                     | 1,480                                                  | n.i.                                                           | None                          |
| 9  | F      | 28  | Nurse staff          | 20                                   | 74                                                     | 1,838,200                                              | 1815                                                           | None                          |
| 10 | M      | 28  | Medical staff        | n.a.                                 | 75                                                     | n.a.                                                   | n.i.                                                           | None                          |
| 11 | M      | 44  | Medical staff        | 25                                   | 76                                                     | 11,293                                                 | 4040                                                           | None                          |
| 12 | F      | 57  | Administrative staff | n.a.                                 | 88                                                     | 1,937,600                                              | 5700                                                           | None                          |
| 13 | M      | 59  | Administrative staff | 29                                   | 90                                                     | >10,000,000                                            | 20                                                             | Solid organ transplant (past) |

BAU, binding arbitrary units; n.a., not available; n.i. not included in the study.

Supplemental Figure

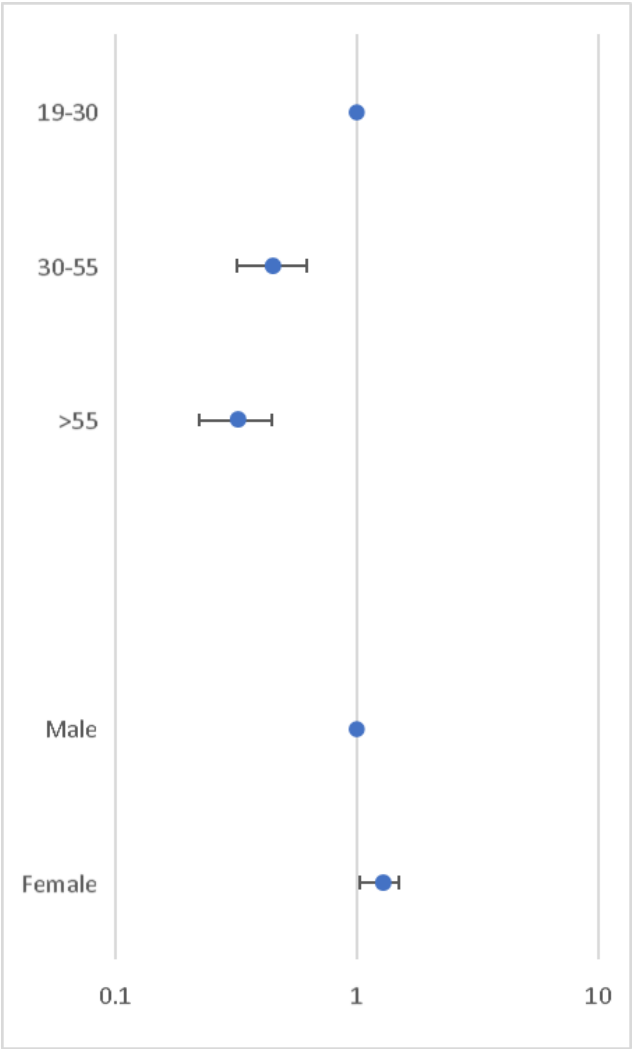

Multivariable logistic regression
